# Supplementary material for: MiR-138 protects cardiac cells against hypoxia through modulation of glucose metabolism by targetting pyruvate dehydrogenase kinase 1
Source: PubMed Central journal article supplement (PMC5696451; doi:10.1042/bsr20170296), 2017-11-21

# Supplementary data

Figure 1

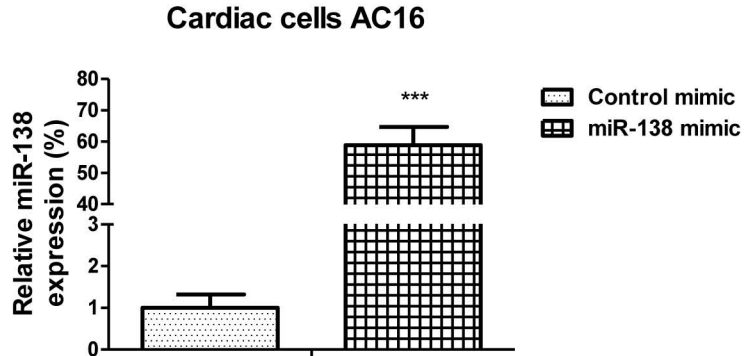

# Supplementary data

Figure 2

## Targetscan

|                                   | Predicted consequential pairing of target region (top) and miRNA (bottom) | Site type |
|-----------------------------------|---------------------------------------------------------------------------|-----------|
| Position 2521-2528 of PDK1 3' UTR | 5' ... AGGAGCUAAUUUGUC-CACCAGCA. . .                                      | 8mer      |
| hsa-miR-138-5p                    | 3'                                      <br>GCCGGACUAAGUGUUGUGGUCGA       |           |

## microRNA.org

| hsa-miR-138/PDK1 Alignment                |  |                  |         |
|-------------------------------------------|--|------------------|---------|
| 3' gccgGACUAAGUGUUGUGGUCGa 5' hsa-miR-138 |  | mirSVR score:    | -0.7625 |
| :::                                       |  | PhastCons score: | 0.6093  |
| 2507:5' ggagCUAAUUUGU-CCACCAGCa 3' PDK1   |  |                  |         |

## Exiqon

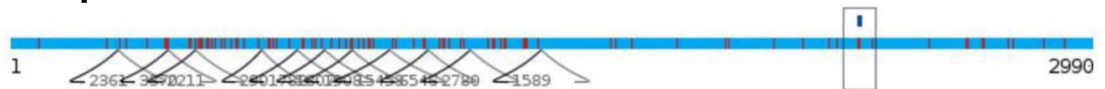

GCCACCTGAAAGGTTTTAGATTTTATAGGAGCTAATTTGCCACCAGCATTAAATGTAACACAGTGTAGTTATGAAAATATATTGAAGGAC  
2301 2391

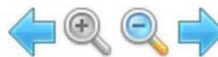

— = Transcript    — = Intron    — = variation    — = UTR    — = miRNA seed

### Visual representation of [hsa-miR-138-5p](#) on [PDK1](#)

For each transcript, the interaction is shown as a vertical blue line above the sequence. It is possible to zoom to sequence level for each transcript by clicking Details

# Supplementary data

Figure 3

Human PDK1 ENST00000282077.3 3' UTR length: 12700

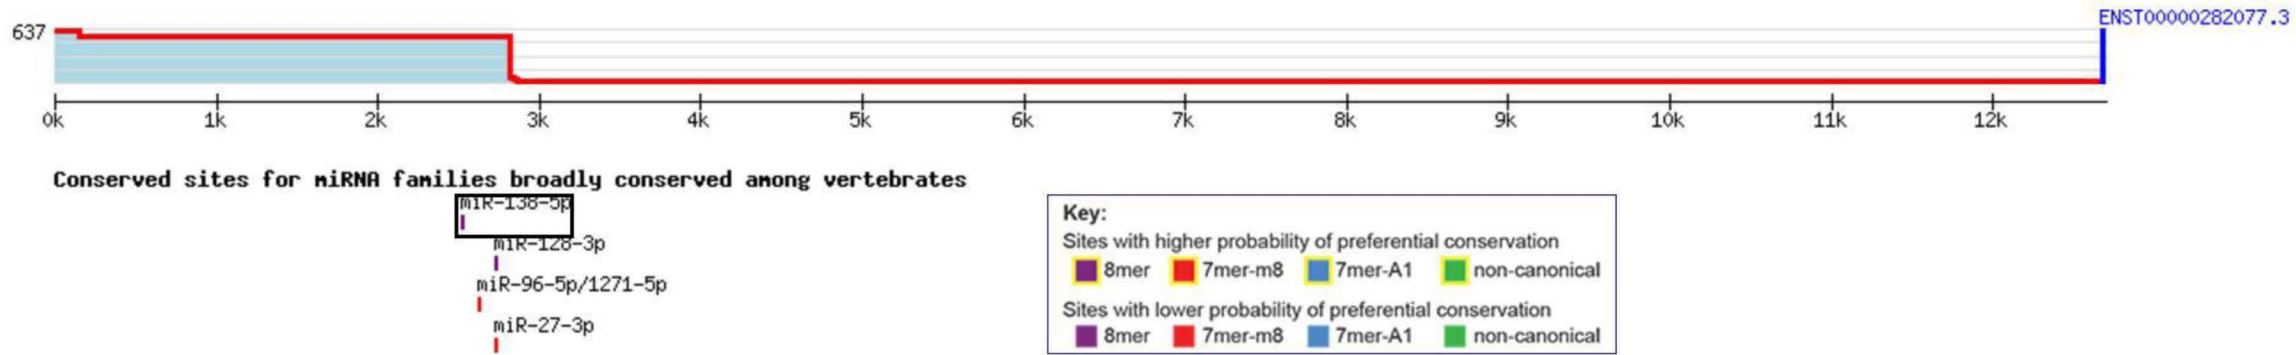

Figure 4

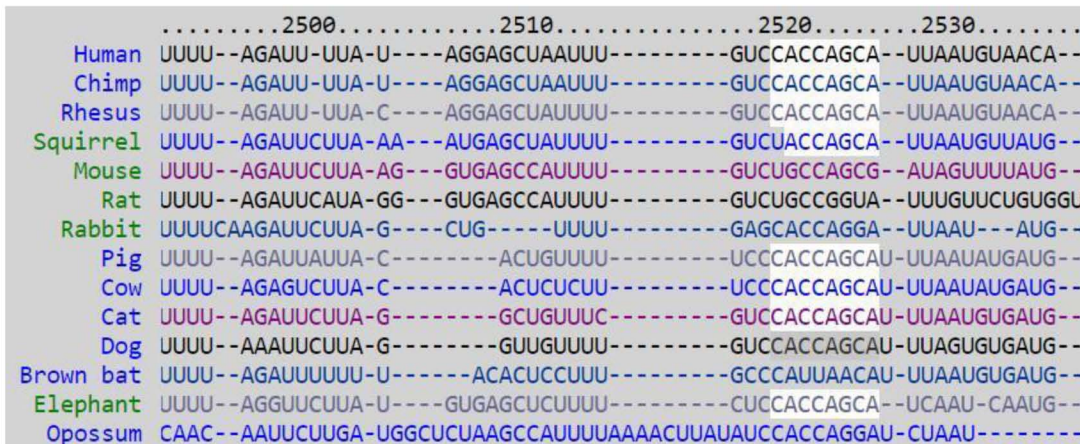

Figure 5

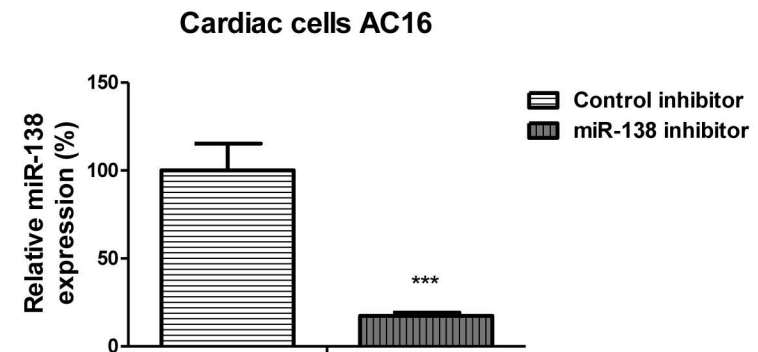

Supplement: bsr20170296_Supp1.pdf [file bsr20170296_Supp1.pdf]
